# Supplementary material
Source: publisher figshare collection journal article supplement (https://tandf.figshare.com/ndownloader/files/16686278)
Supplement: Supplementary file 1 [file 16686278]

| Drug |
| --- |
| mecobalamin, cisplatin, methylprednisolone oxaliplatin, EPO, teniposide, vitamin B12, glutathione, folic acid, digoxin, iron, azathioprine, hydroxycarbamide, yi xie sheng, liver extract, thymosin, omacetaxine mepesuccinate, sheng xie ning, tranexamic acid, mannatide, etamsylate, deferasirox, recombinant human granulocyte colony-stimulating factor, cladribine, busulfan ethamsylate, xin nao xin, human albumin, cytarabine, methotrexate, etoposide |
| Disease |
| anemia, hemolysis, hypothyroidism, G6PD deficiency, hemoglobinopathy, malignant tumor, leukemia, rheumatoid arthritis, lupus, myeloma, thymoma, cancer, abnormal bone marrow, red blood cell disease, DIC, hemophagocytic syndrome, shock, cytopenia |

**Table S1** Drugs and diseases excluded
